# Supplementary material for: Structural proof of a [C–F–C]+ fluoronium cation
Source: PubMed Central journal article supplement (PMC8421340; doi:10.1038/s41467-021-25592-6), 2021-09-06
Supplement: 41467_2021_25592_MOESM1_ESM.pdf [file 41467_2021_25592_MOESM1_ESM.pdf]

# 1 **Structural Proof of a [C–F–C]<sup>+</sup> Fluoronium Cation**

2 Kurt F. Hoffmann, Anja Wiesner, Carsten Müller, Simon Steinhauer, Muhammad Kazim,  
3 Cody Ross Pitts, Thomas Lectka<sup>2\*</sup>, Sebastian Riedel<sup>1\*</sup>

4 Correspondence to: <sup>1</sup> s.riedel@fu-berlin.de; <sup>2</sup> lectka@jhu.edu

5

## 6 **Supplementary Information:**

7

8

9

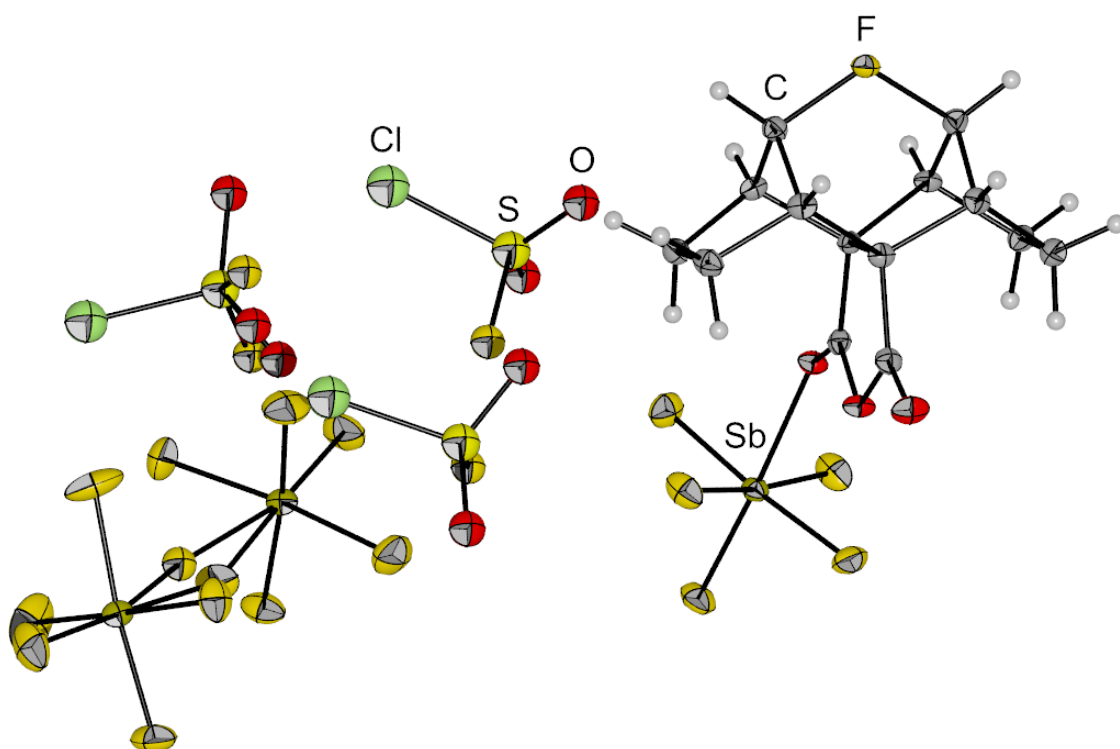

**Supplementary Fig. 1.** Molecular structure of [1][Sb<sub>2</sub>F<sub>11</sub>](SO<sub>2</sub>ClF)<sub>3</sub>. Thermal ellipsoids set at 50 % probability.

10 **Supplementary Table 1.** Summary of crystal data and refinement results

|                                                              | [1][Sb <sub>2</sub> F <sub>11</sub> ](SO <sub>2</sub> ClF) <sub>3</sub>                                       |
|--------------------------------------------------------------|---------------------------------------------------------------------------------------------------------------|
| CCDC number                                                  | CCDC-2049161                                                                                                  |
| empirical formula                                            | C <sub>14</sub> H <sub>14</sub> Cl <sub>3</sub> F <sub>20</sub> O <sub>9</sub> S <sub>3</sub> Sb <sub>3</sub> |
| formula weight                                               | 1274.03                                                                                                       |
| temperature [K]                                              | 100.0                                                                                                         |
| crystal system                                               | monoclinic                                                                                                    |
| space group                                                  | <i>P</i> 2 <sub>1</sub> / <i>c</i>                                                                            |
| <i>a</i> [pm]                                                | 9.4660(4)                                                                                                     |
| <i>b</i> [pm]                                                | 25.0063(11)                                                                                                   |
| <i>c</i> [pm]                                                | 14.8266(7)                                                                                                    |
| $\alpha$ [°]                                                 | 90                                                                                                            |
| $\beta$ [°]                                                  | 92.532(2)                                                                                                     |
| $\gamma$ [°]                                                 | 90                                                                                                            |
| volume [Å <sup>3</sup> ]                                     | 3506.2(3)                                                                                                     |
| <i>Z</i>                                                     | 4                                                                                                             |
| $\rho_{\text{calcd}}$ [g · cm <sup>-3</sup> ]                | 2.414                                                                                                         |
| $\mu$ [mm <sup>-1</sup> ]                                    | 2.850                                                                                                         |
| dimension [mm]                                               | 0.435 × 0.185 × 0.164                                                                                         |
| color                                                        | yellow                                                                                                        |
| reflection collected                                         | 101280                                                                                                        |
| independent reflections                                      | 8747 [ <i>R</i> <sub>int</sub> = 0.0981]                                                                      |
| data/restraints/parameters                                   | 8747/29/498                                                                                                   |
| goodness-of-fit on <i>F</i> <sup>2</sup>                     | 1.040                                                                                                         |
| final <i>R</i> indexes [ <i>I</i> > 2 $\sigma$ ( <i>I</i> )] | <i>R</i> <sub>1</sub> = 0.0328<br><i>wR</i> <sub>2</sub> = 0.0549                                             |
| final <i>R</i> indexes [all data]                            | <i>R</i> <sub>1</sub> = 0.0562<br><i>wR</i> <sub>2</sub> = 0.0579                                             |

11

12 **Supplementary Table 2.** Bond lengths of [1][Sb<sub>2</sub>F<sub>11</sub>](SO<sub>2</sub>ClF)<sub>3</sub>.

| Atom | Atom | Length/Å   | Atom | Atom | Length/Å   | Atom | Atom | Length/Å |
|------|------|------------|------|------|------------|------|------|----------|
| Sb1  | F2   | 1.8611(16) | Sb2  | F12A | 2.11(3)    | O2   | C13  | 1.495(3) |
| Sb1  | F6   | 1.8613(17) | S1S  | Cl1S | 1.9727(12) | O3   | C13  | 1.164(4) |
| Sb1  | F5   | 1.8564(18) | S1S  | F1S  | 1.527(2)   | C14  | C7   | 1.497(4) |
| Sb1  | F4   | 1.8625(17) | S1S  | O2S  | 1.405(3)   | C7   | C6   | 1.556(4) |
| Sb1  | O1   | 2.0971(18) | S1S  | O1S  | 1.400(2)   | C7   | C12  | 1.561(4) |
| Sb1  | F3   | 1.8628(18) | S2S  | Cl2S | 1.9713(11) | C7   | C8   | 1.546(4) |
| Sb3  | F17  | 1.8489(18) | S2S  | F2S  | 1.538(2)   | C11  | C10  | 1.546(4) |
| Sb3  | F12  | 2.027(10)  | S2S  | O4S  | 1.401(2)   | C11  | C1   | 1.516(4) |
| Sb3  | F16  | 1.8548(18) | S2S  | O3S  | 1.398(3)   | C11  | C12  | 1.549(4) |
| Sb3  | F13  | 1.854(2)   | S3S  | Cl3S | 1.9565(17) | C10  | C9   | 1.560(4) |
| Sb3  | F14  | 1.850(2)   | S3S  | O5S  | 1.387(3)   | C6   | C2   | 1.517(4) |
| Sb3  | F15  | 1.8535(19) | S3S  | F3S  | 1.709(9)   | C6   | C5   | 1.548(4) |
| Sb3  | F12A | 1.91(4)    | S3S  | O6S  | 1.323(7)   | C1   | C8   | 1.524(4) |
| Sb2  | F10  | 1.8589(17) | S3S  | F3AS | 1.526(7)   | C12  | C13  | 1.506(4) |
| Sb2  | F11  | 1.8558(19) | S3S  | O6AS | 1.360(7)   | C12  | C3   | 1.553(4) |
| Sb2  | F12  | 2.033(6)   | F1   | C1   | 1.566(3)   | C8   | C9   | 1.546(4) |
| Sb2  | F9   | 1.851(2)   | F1   | C2   | 1.587(3)   | C4   | C3   | 1.548(4) |
| Sb2  | F7   | 1.8469(19) | O1   | C14  | 1.243(3)   | C4   | C5   | 1.568(4) |
| Sb2  | F8   | 1.8554(18) | O2   | C14  | 1.306(3)   | C2   | C3   | 1.511(4) |

13

14 **Supplementary Table 3.** Bond angles of [1][Sb<sub>2</sub>F<sub>11</sub>](SO<sub>2</sub>ClF)<sub>3</sub>.

| Atom | Atom | Atom | Angle/°    | Atom | Atom | Atom | Angle/°    | Atom | Atom | Atom | Angle/°    |
|------|------|------|------------|------|------|------|------------|------|------|------|------------|
| F2   | Sb1  | F6   | 94.66(8)   | F7   | Sb2  | F12  | 178.0(4)   | C1   | F1   | C2   | 115.64(17) |
| F2   | Sb1  | F4   | 93.88(8)   | F7   | Sb2  | F9   | 94.03(10)  | C14  | O1   | Sb1  | 129.82(18) |
| F2   | Sb1  | O1   | 176.97(8)  | F7   | Sb2  | F8   | 95.15(9)   | Sb3  | F12  | Sb2  | 155.9(7)   |
| F2   | Sb1  | F3   | 91.80(8)   | F7   | Sb2  | F12A | 165(5)     | C14  | O2   | C13  | 110.7(2)   |
| F6   | Sb1  | F4   | 171.46(7)  | F8   | Sb2  | F10  | 169.22(9)  | O1   | C14  | O2   | 122.5(2)   |
| F6   | Sb1  | O1   | 86.01(7)   | F8   | Sb2  | F11  | 88.30(9)   | O1   | C14  | C7   | 123.8(3)   |
| F6   | Sb1  | F3   | 89.63(9)   | F8   | Sb2  | F12  | 85.95(17)  | O2   | C14  | C7   | 113.7(2)   |
| F5   | Sb1  | F2   | 92.88(8)   | F8   | Sb2  | F12A | 84.6(19)   | C14  | C7   | C6   | 113.7(2)   |
| F5   | Sb1  | F6   | 89.48(9)   | F1S  | S1S  | Cl1S | 98.88(11)  | C14  | C7   | C12  | 103.6(2)   |
| F5   | Sb1  | F4   | 90.01(8)   | O2S  | S1S  | Cl1S | 109.41(12) | C14  | C7   | C8   | 116.8(2)   |
| F5   | Sb1  | O1   | 84.16(8)   | O2S  | S1S  | F1S  | 106.94(15) | C6   | C7   | C12  | 104.1(2)   |
| F5   | Sb1  | F3   | 175.29(8)  | O1S  | S1S  | Cl1S | 108.97(13) | C8   | C7   | C6   | 112.4(2)   |
| F4   | Sb1  | O1   | 85.46(7)   | O1S  | S1S  | F1S  | 107.82(16) | C8   | C7   | C12  | 104.6(2)   |
| F4   | Sb1  | F3   | 90.18(9)   | O1S  | S1S  | O2S  | 122.26(17) | C10  | C11  | C12  | 110.7(2)   |
| F3   | Sb1  | O1   | 91.16(8)   | F2S  | S2S  | Cl2S | 98.17(9)   | C1   | C11  | C10  | 97.8(2)    |
| F17  | Sb3  | F12  | 84.9(5)    | O4S  | S2S  | Cl2S | 108.52(11) | C1   | C11  | C12  | 99.5(2)    |
| F17  | Sb3  | F16  | 90.58(9)   | O4S  | S2S  | F2S  | 107.11(14) | C11  | C10  | C9   | 104.2(2)   |
| F17  | Sb3  | F13  | 92.90(9)   | O3S  | S2S  | Cl2S | 110.33(12) | C2   | C6   | C7   | 99.0(2)    |
| F17  | Sb3  | F14  | 172.59(11) | O3S  | S2S  | F2S  | 107.18(15) | C2   | C6   | C5   | 97.1(2)    |
| F17  | Sb3  | F15  | 89.84(10)  | O3S  | S2S  | O4S  | 122.68(16) | C5   | C6   | C7   | 111.2(2)   |
| F17  | Sb3  | F12A | 99(3)      | O5S  | S3S  | Cl3S | 109.55(14) | C11  | C1   | F1   | 109.5(2)   |
| F16  | Sb3  | F12  | 84.13(18)  | O5S  | S3S  | F3S  | 93.3(4)    | C11  | C1   | C8   | 99.2(2)    |
| F16  | Sb3  | F12A | 95(4)      | O5S  | S3S  | F3AS | 114.6(4)   | C8   | C1   | F1   | 108.1(2)   |
| F13  | Sb3  | F12  | 177.0(5)   | F3S  | S3S  | Cl3S | 97.9(3)    | C11  | C12  | C7   | 103.5(2)   |
| F13  | Sb3  | F16  | 93.85(10)  | O6S  | S3S  | Cl3S | 116.6(4)   | C11  | C12  | C3   | 112.6(2)   |
| F13  | Sb3  | F12A | 165(5)     | O6S  | S3S  | O5S  | 128.6(4)   | C13  | C12  | C7   | 105.3(2)   |
| F14  | Sb3  | F12  | 87.7(5)    | O6S  | S3S  | F3S  | 101.4(5)   | C13  | C12  | C11  | 115.2(2)   |
| F14  | Sb3  | F16  | 89.06(10)  | F3AS | S3S  | Cl3S | 101.0(3)   | C13  | C12  | C3   | 114.5(2)   |
| F14  | Sb3  | F13  | 94.51(11)  | O6AS | S3S  | Cl3S | 99.3(4)    | C3   | C12  | C7   | 104.1(2)   |
| F14  | Sb3  | F15  | 89.35(11)  | O6AS | S3S  | O5S  | 121.8(5)   | C7   | C8   | C9   | 110.7(2)   |
| F14  | Sb3  | F12A | 74(3)      | O6AS | S3S  | F3AS | 107.7(5)   | C1   | C8   | C7   | 99.1(2)    |
| F15  | Sb3  | F12  | 86.81(19)  | O4S  | S2S  | Cl2S | 108.52(11) | C1   | C8   | C9   | 97.5(2)    |
| F15  | Sb3  | F16  | 170.85(10) | O4S  | S2S  | F2S  | 107.11(14) | C3   | C4   | C5   | 103.9(2)   |
| F15  | Sb3  | F13  | 95.26(10)  | O3S  | S2S  | Cl2S | 110.33(12) | C8   | C9   | C10  | 104.0(2)   |
| F15  | Sb3  | F12A | 76(4)      | O3S  | S2S  | F2S  | 107.18(15) | O2   | C13  | C12  | 106.7(2)   |
| F10  | Sb2  | F12  | 83.45(18)  | O3S  | S2S  | O4S  | 122.68(16) | O3   | C13  | O2   | 118.0(2)   |
| F10  | Sb2  | F12A | 85(2)      | O5S  | S3S  | Cl3S | 109.55(14) | O3   | C13  | C12  | 135.3(3)   |
| F11  | Sb2  | F10  | 89.23(9)   | O5S  | S3S  | F3S  | 93.3(4)    | C6   | C2   | F1   | 108.4(2)   |
| F11  | Sb2  | F12  | 87.3(5)    | O5S  | S3S  | F3AS | 114.6(4)   | C3   | C2   | F1   | 108.4(2)   |
| F11  | Sb2  | F12A | 70(5)      | F3S  | S3S  | Cl3S | 97.9(3)    | C3   | C2   | C6   | 99.9(2)    |
| F9   | Sb2  | F10  | 90.18(9)   | O6S  | S3S  | Cl3S | 116.6(4)   | C4   | C3   | C12  | 111.3(2)   |
| F9   | Sb2  | F11  | 171.47(10) | O6S  | S3S  | O5S  | 128.6(4)   | C2   | C3   | C12  | 99.5(2)    |
| F9   | Sb2  | F12  | 84.2(5)    | O6S  | S3S  | F3S  | 101.4(5)   | C2   | C3   | C4   | 97.1(2)    |
| F9   | Sb2  | F8   | 90.71(10)  | F3AS | S3S  | Cl3S | 101.0(3)   | C6   | C5   | C4   | 104.2(2)   |
| F9   | Sb2  | F12A | 101(5)     | O6AS | S3S  | Cl3S | 99.3(4)    | Sb3  | F12A | Sb2  | 162(6)     |
| F7   | Sb2  | F10  | 95.51(9)   | O6AS | S3S  | O5S  | 121.8(5)   |      |      |      |            |
| F7   | Sb2  | F11  | 94.49(10)  | O6AS | S3S  | F3AS | 107.7(5)   |      |      |      |            |

15

16

17

18

19

20

21

22

23

24

25

26 **Supplementary Table 4.** Calculated vibrational frequencies and C–X–C bond angles of different dimethyl  
 27 halonium ions [Me<sub>2</sub>X]<sup>+</sup> (X = F, Cl, Br, I), double-norbornyl type halonium ions [DNTX]<sup>+</sup> (C<sub>2v</sub> symmetry) and HC-  
 28 substituted [R<sub>2</sub>DNTX]<sup>+</sup> halonium ions (R = F, Me, CF<sub>3</sub>) at def2-TZVPP/B3LYP level of theory. Frequencies are  
 29 given in cm<sup>-1</sup>. Relative intensities are given in brackets.

|                                                                                     |                                                      | $\nu_s$ (cage)  | $\nu_s$ (C-X-C)  | $\nu_{as}$ (cage)     | $\nu_{as}$ (C-X-C) | <(C-X-C) |
|-------------------------------------------------------------------------------------|------------------------------------------------------|-----------------|------------------|-----------------------|--------------------|----------|
| 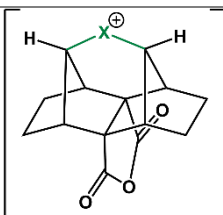   | [DNTF] <sup>+</sup>                                  | 724 (6)         | 488 (6)          | 588 (29)              | 304 (34)           | 115°     |
|                                                                                     | [DNTCl] <sup>+</sup>                                 | 711 (11)        | 386 (4)          | 657 (22)              | 313 (3)            | 98°      |
|                                                                                     | [DNTBr] <sup>+</sup>                                 | 710 (15)        | 368 (4)          | 651 (19)              | 253 (2)            | 92°      |
|                                                                                     | [DNTI] <sup>+</sup>                                  | 709 (18)        | 365 (3)          | 649 (14)              | 234 (1)            | 86°      |
|                                                                                     |                                                      | $\nu_s$ (C-X-C) | $\delta$ (C-X-C) | $\nu_{as}$ (C-X-C)    |                    | <(C-X-C) |
|   | [Me <sub>2</sub> F] <sup>+</sup>                     | 659 (12)        | 264 (1)          | 677 (100)             |                    | 121°     |
|                                                                                     | [Me <sub>2</sub> Cl] <sup>+</sup>                    | 561 (41)        | 228 (1)          | 604 (100)             |                    | 105°     |
|                                                                                     | [Me <sub>2</sub> Br] <sup>+</sup>                    | 500 (55)        | 187 (4)          | 517 (100)             |                    | 101°     |
|                                                                                     | [Me <sub>2</sub> I] <sup>+</sup>                     | 470 (41)        | 160 (3)          | 484 (52)              |                    | 98°      |
|                                                                                     |                                                      | $\nu_s$ (cage)  | $\nu_s$ (C-X-C)  | $\nu_{as}$ (cage)     | $\nu_{as}$ (C-X-C) | <(C-X-C) |
|  | [F <sub>2</sub> DNTF] <sup>+</sup> <sup>a)</sup>     | 850/800         | 552/474          | 688                   | -168               | 115°     |
|                                                                                     | [F <sub>2</sub> DNTCl] <sup>+</sup>                  | 831/780         | 519/415          | 685                   | 237                | 97°      |
|                                                                                     | [(CH <sub>3</sub> ) <sub>2</sub> DNTF] <sup>+</sup>  | 708/679         | 546/467          | 638/552               | 176 <sup>b)</sup>  | 119°     |
|                                                                                     | [(CH <sub>3</sub> ) <sub>2</sub> DNTCl] <sup>+</sup> | 709/667         | 518/402          | 660/563               | 363 <sup>c)</sup>  | 102°     |
|                                                                                     | [(CF <sub>3</sub> ) <sub>2</sub> DNTF] <sup>+</sup>  | 847/803         | 509              | 691/537               | 375                | 118°     |
|                                                                                     | [(CF <sub>3</sub> ) <sub>2</sub> DNTCl] <sup>+</sup> | 868/792         | 405              | 715/546 <sup>d)</sup> | 376                | 101°     |

30 <sup>a)</sup>: Transition state connecting two carbo-cationic structure

31 <sup>b)</sup>: coupled with modes at 434, 341 and 161 cm<sup>-1</sup>

32 <sup>c)</sup>: coupled with mode at 278 cm<sup>-1</sup>

33 <sup>d)</sup>: coupled with modes at 764 and 742 cm<sup>-1</sup>

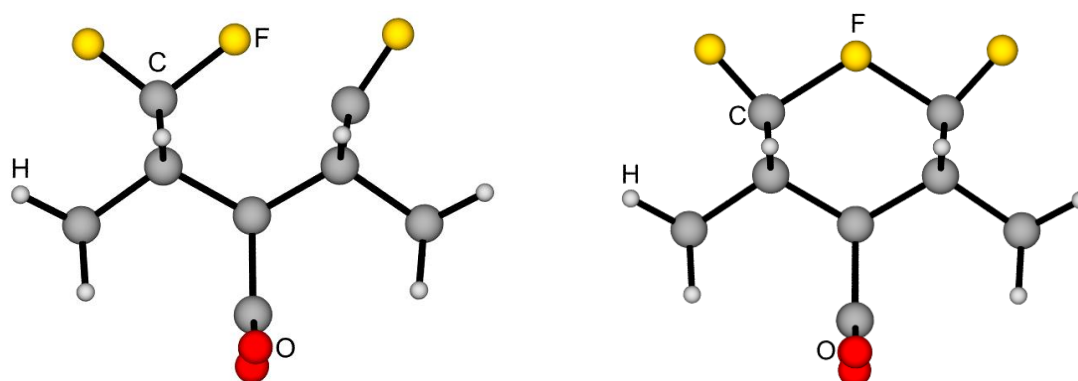

34

35 **Supplementary Fig. 2.** Calculated structures of  $[\text{F}_2\text{DNTF}]^+$  (B3LYP/def2-TZVPP). Left: Ground state with  
 36 carbo-cationic structure. Right: Transition state with  $C_{2v}$  symmetry.

37

38

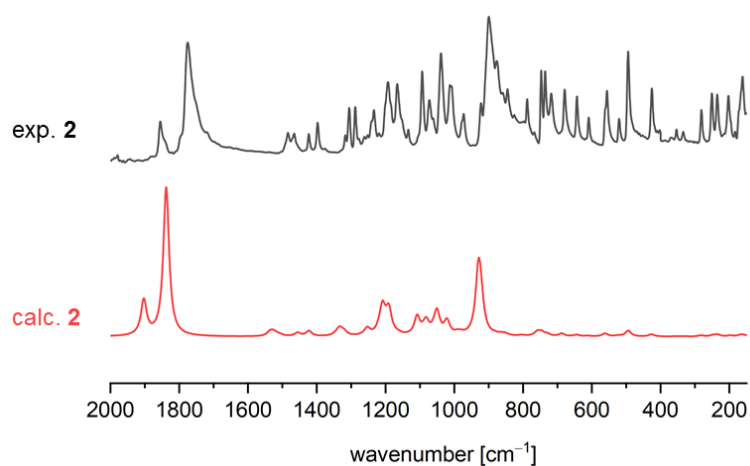

39

40 **Supplementary Fig. 3.** Experimental and calculated (B3LYP/def2-TZVPP) IR spectra of precursor **2**.

41

42

43 **Supplementary Table 5.** Selected experimental and calculated (B3LYP/def2-TZVPP) vibrations of precursor **2**.

44

45

| Frequencies [ $\text{cm}^{-1}$ ] |            | Assignments                                   |
|----------------------------------|------------|-----------------------------------------------|
| experimental                     | calculated |                                               |
| 1855 (m)                         | 1903 (m)   | $\nu_s(\text{C}=\text{O})$                    |
| 1775 (vs)                        | 1838 (vs)  | $\nu_{\text{as}}(\text{C}=\text{O})$          |
| 900 (vs)                         | 930 (s)    | $\nu_{\text{as}}(\text{C}-\text{O}-\text{C})$ |

vs=very strong, s=strong, m=medium

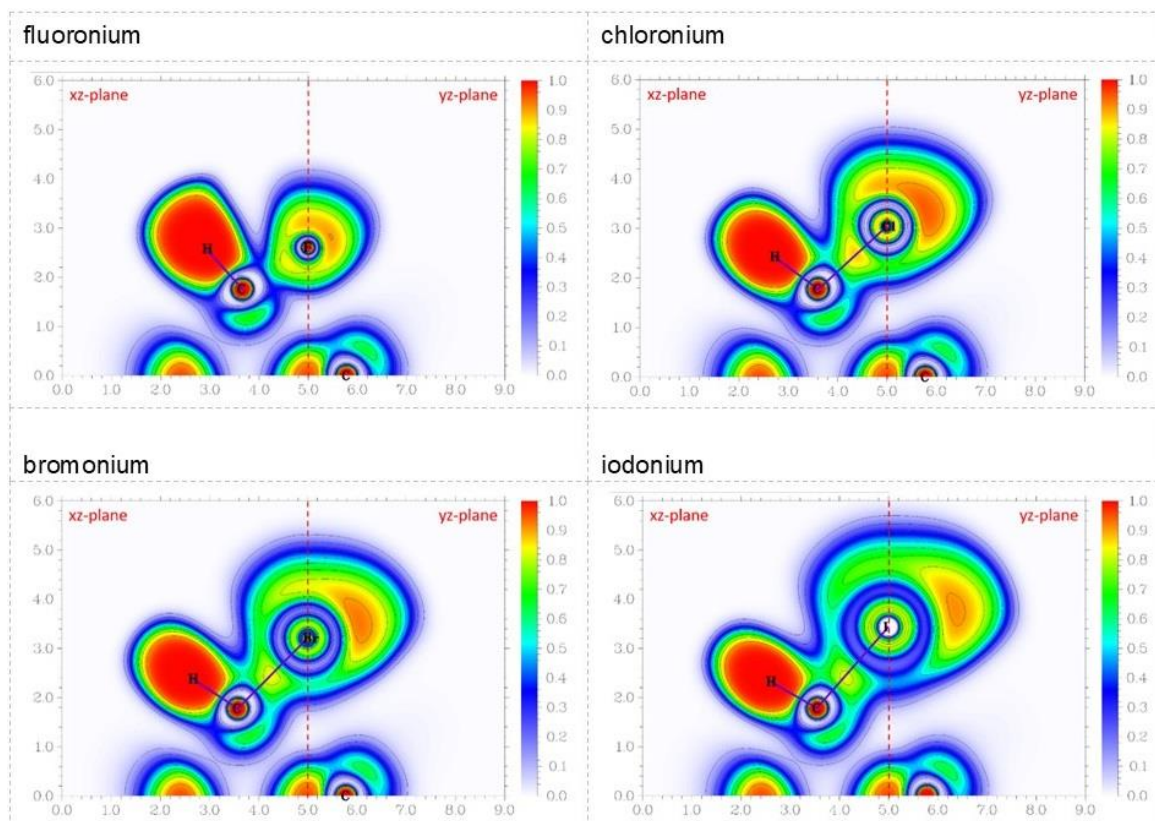

46  
 47 **Supplementary Fig. 4.** Electron localization function in the C–X–C plane (“xz-plane”) and the plane containing  
 48 the halogen’s lone pairs, perpendicular to the former one (yz-plane). Both planes are merged at the molecule’s  
 49 main axis (dashed red line). ELF is defined from 0.0 (white) to 1.0 (red); contours are drawn in intervals of 0.1.

50

51 **Supplementary Table 6.** Atomic charges of fluoronium in  $C_{2v}$  symmetry.

| Atom(s)      | AIM    | NBO    | Mulliken | ChelpG | Merz-Kollmann | Voronoi | Löwdin |
|--------------|--------|--------|----------|--------|---------------|---------|--------|
| 1 F          | -0.521 | -0.260 | -0.136   | -0.132 | -0.094        | 0.058   | 0.382  |
| 2 O          | -0.031 | -0.490 | -0.163   | -0.441 | -0.480        | -0.100  | 0.399  |
| 3/13 C       | -0.009 | -0.119 | -0.063   | 0.038  | -0.120        | -0.031  | -0.067 |
| 4/9/14/25 C  | 0.041  | -0.256 | -0.046   | -0.219 | -0.237        | -0.042  | 0.029  |
| 5/10/15/26 H | 0.072  | 0.254  | 0.139    | 0.128  | 0.174         | 0.091   | 0.005  |
| 6/16/19/27 C | 0.000  | -0.388 | -0.223   | -0.036 | -0.101        | -0.042  | 0.100  |
| 7/18/21/28 H | 0.056  | 0.238  | 0.140    | 0.067  | 0.106         | 0.082   | 0.001  |
| 8/17/20/29 H | 0.050  | 0.233  | 0.147    | 0.075  | 0.108         | 0.066   | 0.002  |
| 11/23 C      | 0.245  | 0.285  | 0.150    | 0.284  | 0.258         | 0.116   | 0.083  |
| 12/24 H      | 0.141  | 0.236  | 0.177    | 0.135  | 0.160         | 0.117   | 0.012  |
| 22/30 C      | 1.556  | 0.788  | 0.286    | 0.734  | 0.839         | 0.225   | -0.453 |
| 31/32 O      | -1.101 | -0.479 | -0.216   | -0.444 | -0.448        | -0.217  | 0.259  |

52

53

54

55

56

57

58

59

60
