# Supplementary material for: Structural proof of a [C–F–C]+ fluoronium cation
Source: PubMed Central journal article supplement (PMC8421340; doi:10.1038/s41467-021-25592-6), 2021-09-06
Supplement: 41467_2021_25592_MOESM4_ESM.pdf [file 41467_2021_25592_MOESM4_ESM.pdf]

## **Description of Additional Supplementary Files**

File name: Supplementary Data 1

Description: Cartesian coordinates of quantum-chemical optimized structures

File name: Supplementary Movie 1

Description: Animations of selected modes of the double-norbornyl type fluoronium ion
